# Supplementary material
Source: PubMed Central journal article supplement (PMC5503815)
Supplement: NIHMS841389-supplement-Supp_FigS1.pdf [file NIHMS841389-supplement-Supp_FigS1.pdf]

HCUP = Health Care Cost & Utilization Project; AHRQ:  
<http://www.ahrq.gov/research/data/hcup/index.html>

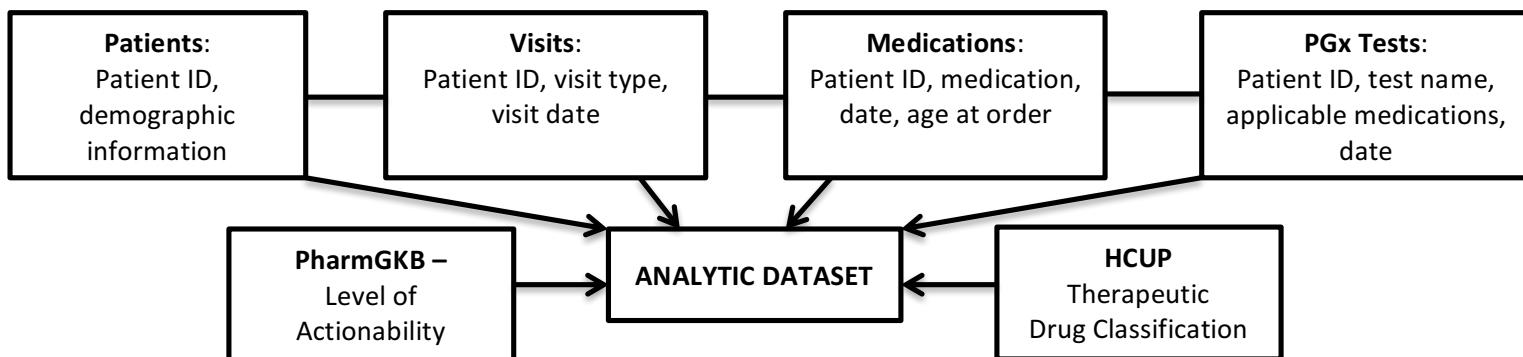

HCUP = Health Care Cost & Utilization Project: <http://www.ahrq.gov/research/data/hcup/index.html>;  
ID = Identification; PGx = Pharmacogenomic
